# Supplementary material for: High-Throughput Transcriptomic Profiling Reveals the Inhibitory Effect of Hydroquinine on Virulence Factors in Pseudomonas aeruginosa
Source: MDPI journal article supplement (doi:10.3390/antibiotics11101436), 2022-10-19
Supplement: s1 [file s1]

**Table S1.** Significant differential expression genes (DEGs) of *P. aeruginosa* ATCC 27853 treated with 1.250 mg/mL of hydroquinine

| DEGs   | Log <sub>2</sub> F<br>C | logCPM | P-Value  | FDR      | Product                                                                                           | RefSeq    |
|--------|-------------------------|--------|----------|----------|---------------------------------------------------------------------------------------------------|-----------|
| PA4599 | 9.47                    | 11.10  | 4.79E-23 | 2.56E-19 | Resistance-Nodulation-Cell Division (RND) multidrug efflux membrane fusion protein MexC precursor | NP_253289 |
| PA1225 | 7.93                    | 10.12  | 9.46E-19 | 2.53E-15 | NAD(P)H dehydrogenase                                                                             | NP_249916 |
| PA4990 | 6.84                    | 8.40   | 3.91E-15 | 5.22E-12 | SMR multidrug efflux transporter                                                                  | NP_253677 |
| PA2932 | 6.69                    | 9.02   | 3.85E-15 | 5.22E-12 | morphinone reductase                                                                              | NP_251622 |
| PA4598 | 6.27                    | 9.81   | 3.59E-14 | 3.83E-11 | Resistance-Nodulation-Cell Division (RND) multidrug efflux transporter MexD                       | NP_253288 |
| PA4354 | 6.10                    | 10.73  | 8.44E-14 | 7.51E-11 | hypothetical protein                                                                              | NP_253044 |
| PA1282 | 6.05                    | 7.83   | 5.86E-13 | 3.91E-10 | major facilitator superfamily (MFS) transporter                                                   | NP_249973 |
| PA4597 | 6.02                    | 8.32   | 3.80E-13 | 2.90E-10 | Multidrug efflux outer membrane protein OprJ precursor                                            | NP_253287 |
| PA3720 | 5.83                    | 7.55   | 2.79E-12 | 1.66E-09 | hypothetical protein                                                                              | NP_252409 |
| PA3719 | 5.71                    | 5.60   | 1.48E-10 | 6.10E-08 | antirepressor for MexR, ArmR                                                                      | NP_252408 |
| PA2931 | 5.31                    | 9.57   | 1.72E-11 | 9.16E-09 | CifR                                                                                              | NP_251621 |
| PA0465 | 5.29                    | 8.12   | 3.57E-11 | 1.73E-08 | inner membrane protein CreD                                                                       | NP_249156 |
| PA2019 | 5.26                    | 7.85   | 5.55E-11 | 2.47E-08 | Resistance-Nodulation-Cell Division (RND) multidrug efflux membrane fusion protein MexX precursor | NP_250709 |
| PA2850 | 5.24                    | 6.77   | 1.78E-10 | 6.77E-08 | organic hydroperoxide resistance protein                                                          | NP_251540 |
| PA0466 | 4.95                    | 5.27   | 6.64E-09 | 1.48E-06 | hypothetical protein                                                                              | NP_249157 |
| PA4288 | 4.90                    | 7.31   | 6.93E-10 | 1.85E-07 | transcriptional regulator                                                                         | NP_252978 |
| PA2018 | 4.90                    | 8.95   | 2.88E-10 | 9.60E-08 | Resistance-Nodulation-Cell Division (RND) multidrug efflux transporter MexY                       | NP_250708 |
| PA0534 | 4.89                    | 8.64   | 3.31E-10 | 1.04E-07 | FAD-dependent oxidoreductase                                                                      | NP_249225 |
| PA4623 | 4.88                    | 10.51  | 2.29E-10 | 8.16E-08 | hypothetical protein                                                                              | NP_253313 |
| PA3126 | 4.82                    | 10.69  | 3.52E-10 | 1.04E-07 | heat-shock protein IbpA                                                                           | NP_251816 |
| PA3690 | 4.75                    | 9.98   | 5.84E-10 | 1.64E-07 | metal-transporting P-type ATPase                                                                  | NP_252380 |
| PA1297 | 4.56                    | 7.14   | 5.13E-09 | 1.19E-06 | metal transporter                                                                                 | NP_249988 |
| PA1283 | 4.56                    | 7.50   | 3.84E-09 | 9.32E-07 | transcriptional regulator                                                                         | NP_249974 |
| PA4881 | 4.51                    | 11.57  | 2.26E-09 | 5.75E-07 | hypothetical protein                                                                              | NP_253568 |
| PA0125 | 4.42                    | 7.31   | 9.55E-09 | 2.04E-06 | ParD antitoxin                                                                                    | NP_248815 |
| PA1970 | 4.29                    | 7.78   | 1.66E-08 | 3.16E-06 | hypothetical protein                                                                              | NP_250660 |

|         |      |       |          |          |                                                 |           |
|---------|------|-------|----------|----------|-------------------------------------------------|-----------|
| PA4596  | 4.28 | 6.35  | 4.18E-08 | 6.98E-06 | EsrC                                            | NP_253286 |
| PA2274  | 4.24 | 3.65  | 4.90E-06 | 0.0005   | hypothetical protein                            | NP_250964 |
| PA3732  | 4.22 | 9.97  | 1.56E-08 | 3.10E-06 | Uncharacterized protein                         | NP_252421 |
| PA3731  | 4.19 | 10.15 | 1.92E-08 | 3.53E-06 | hypothetical protein                            | NP_252420 |
| PA0124  | 4.19 | 7.31  | 3.44E-08 | 6.12E-06 | ParE toxin                                      | NP_248814 |
| PA1290  | 4.12 | 5.46  | 2.95E-07 | 3.75E-05 | transcriptional regulator                       | NP_249981 |
| PA4355  | 4.10 | 9.36  | 3.61E-08 | 6.22E-06 | PyeM                                            | NP_253045 |
| PA0736a | 4.06 | 7.58  | 6.95E-08 | 1.09E-05 | hypothetical protein                            | NP_249427 |
| PA1744  | 4.03 | 6.40  | 1.42E-07 | 2.06E-05 | hypothetical protein                            | NP_250435 |
| PA0737  | 3.98 | 6.98  | 1.36E-07 | 2.06E-05 | hypothetical protein                            | NP_249428 |
| PA1298  | 3.96 | 5.55  | 5.19E-07 | 6.30E-05 | hypothetical protein                            | NP_249989 |
| PA1223  | 3.95 | 6.41  | 2.71E-07 | 3.61E-05 | transcriptional regulator                       | NP_249914 |
| PA1137  | 3.84 | 8.25  | 2.11E-07 | 2.88E-05 | oxidoreductase                                  | NP_249828 |
| PA0474  | 3.71 | 2.81  | 0.0002   | 0.0096   | hypothetical protein                            | NP_249165 |
| PA1503  | 3.67 | 2.78  | 0.0002   | 0.0104   | hypothetical protein                            | NP_250194 |
| PA1030  | 3.67 | 9.40  | 4.81E-07 | 5.97E-05 | hypothetical protein                            | NP_249721 |
| PA2782  | 3.61 | 2.23  | 0.001141 | 0.0306   | biofilm-associated metzincin Inhibitor, BamI    | NP_251472 |
| PA2277  | 3.59 | 5.60  | 2.88E-06 | 0.0003   | ArsR protein                                    | NP_250967 |
| PA2054  | 3.53 | 5.30  | 5.05E-06 | 0.0005   | transcriptional regulator CynR                  | NP_250744 |
| PA2433  | 3.50 | 4.98  | 8.90E-06 | 0.0007   | hypothetical protein                            | NP_251123 |
| PA1942  | 3.49 | 8.82  | 1.44E-06 | 0.0002   | hypothetical protein                            | NP_250632 |
| PA1291  | 3.47 | 6.42  | 2.94E-06 | 0.0003   | hypothetical protein                            | NP_249982 |
| PA3390  | 3.41 | 4.40  | 3.08E-05 | 0.0022   | hypothetical protein                            | NP_252079 |
| PA3062  | 3.40 | 6.23  | 5.02E-06 | 0.0005   | PelC                                            | NP_251752 |
| PA4986  | 3.38 | 7.37  | 3.47E-06 | 0.0004   | oxidoreductase                                  | NP_253673 |
| PA1343  | 3.33 | 8.47  | 3.81E-06 | 0.0004   | hypothetical protein                            | NP_250034 |
| PA0424  | 3.32 | 6.87  | 5.47E-06 | 0.0005   | multidrug resistance operon repressor MexR      | NP_249115 |
| PA2469  | 3.28 | 4.70  | 3.35E-05 | 0.0023   | transcriptional regulator                       | NP_251159 |
| PA0476  | 3.28 | 3.56  | 0.000127 | 0.0065   | permease                                        | NP_249167 |
| PA2746a | 3.27 | 6.30  | 8.97E-06 | 0.0007   | hypothetical protein                            | NP_251436 |
| PA2933  | 3.27 | 3.89  | 7.76E-05 | 0.0044   | major facilitator superfamily (MFS) transporter | NP_251623 |
| PA3962  | 3.24 | 7.94  | 6.96E-06 | 0.0006   | hypothetical protein                            | NP_252651 |
| PA4762  | 3.23 | 10.53 | 5.87E-06 | 0.0005   | heat shock protein GrpE                         | NP_253450 |
| PA4600  | 3.21 | 8.02  | 7.62E-06 | 0.0007   | transcriptional regulator NfxB                  | NP_253290 |
| PA4985  | 3.19 | 6.79  | 1.13E-05 | 0.0009   | Uncharacterized protein                         | NP_253672 |
| PA1743  | 3.19 | 5.67  | 2.22E-05 | 0.0016   | hypothetical protein                            | NP_250434 |
| PA3819  | 3.18 | 10.80 | 7.70E-06 | 0.0007   | hypothetical protein                            | NP_252508 |
| PA1316  | 3.17 | 5.11  | 3.23E-05 | 0.0023   | major facilitator superfamily (MFS) transporter | NP_250007 |
| PA1962  | 3.16 | 3.46  | 0.000233 | 0.0102   | FMN-dependent NADH-azoreductase 2, AzoR2        | NP_250652 |
| PA1066  | 3.08 | 5.73  | 3.48E-05 | 0.0023   | short-chain dehydrogenase                       | NP_249757 |
| PA3133  | 3.07 | 5.53  | 3.58E-05 | 0.0024   | SawR                                            | NP_251823 |
| PA1344  | 3.05 | 8.52  | 1.74E-05 | 0.0013   | short-chain dehydrogenase                       | NP_250035 |

|        |      |       |          |        |                                                  |           |
|--------|------|-------|----------|--------|--------------------------------------------------|-----------|
| PA1596 | 3.04 | 10.72 | 1.65E-05 | 0.0012 | heat shock protein HtpG                          | NP_250287 |
| PA2109 | 3.03 | 3.35  | 0.000398 | 0.0146 | hypothetical protein                             | NP_250799 |
| PA4902 | 3.02 | 5.86  | 4.25E-05 | 0.0027 | transcriptional regulator                        | NP_253589 |
| PA5382 | 3.00 | 6.12  | 3.80E-05 | 0.0025 | transcriptional regulator                        | NP_254069 |
| PA0779 | 2.93 | 10.57 | 3.04E-05 | 0.0022 | AsrA                                             | NP_249470 |
| PA3552 | 2.90 | 7.60  | 4.38E-05 | 0.0028 | ArnB                                             | NP_252242 |
| PA4495 | 2.89 | 9.15  | 4.04E-05 | 0.0026 | hypothetical protein                             | NP_253185 |
| PA3718 | 2.89 | 4.06  | 0.000365 | 0.0138 | major facilitator superfamily (MFS) transporter  | NP_252407 |
| PA3554 | 2.86 | 8.43  | 4.96E-05 | 0.0031 | ArnA                                             | NP_252244 |
| PA0123 | 2.83 | 6.56  | 7.91E-05 | 0.0044 | transcriptional regulator                        | NP_248813 |
| PA3064 | 2.79 | 7.83  | 7.46E-05 | 0.0042 | PelA                                             | NP_251754 |
| PA3952 | 2.79 | 7.04  | 8.96E-05 | 0.0049 | hypothetical protein                             | NP_252641 |
| PA0942 | 2.75 | 6.94  | 0.0001   | 0.0058 | transcriptional regulator                        | NP_249633 |
| PA0738 | 2.74 | 3.94  | 0.0007   | 0.0226 | hypothetical protein                             | NP_249429 |
| PA3132 | 2.73 | 5.36  | 0.0002   | 0.0099 | hydrolase                                        | NP_251822 |
| PA1507 | 2.72 | 5.09  | 0.0002   | 0.0102 | probable transporter                             | NP_250198 |
| PA4761 | 2.71 | 12.24 | 0.0001   | 0.0053 | DnaK protein                                     | NP_253449 |
| PA2930 | 2.70 | 5.68  | 0.0002   | 0.0094 | transcriptional regulator                        | NP_251620 |
| PA5053 | 2.70 | 9.33  | 0.0001   | 0.0057 | heat shock protein HslV                          | NP_253740 |
| PA3597 | 2.70 | 3.41  | 0.0011   | 0.0299 | amino acid permease                              | NP_252287 |
| PA1471 | 2.69 | 5.73  | 0.0002   | 0.0094 | hypothetical protein                             | NP_250162 |
| PA2938 | 2.68 | 4.18  | 0.0007   | 0.0216 | probable transporter                             | NP_251628 |
| PA2009 | 2.67 | 7.09  | 0.0002   | 0.0077 | homogentisate 1,2-dioxygenase                    | NP_250699 |
| PA2815 | 2.64 | 9.96  | 0.0001   | 0.0072 | acyl-CoA dehydrogenase                           | NP_251505 |
| PA2246 | 2.62 | 4.36  | 0.0007   | 0.0225 | transcriptional regulator BkdR                   | NP_250936 |
| PA4773 | 2.61 | 5.33  | 0.0004   | 0.0146 | SpeD2                                            | NP_253461 |
| PA0907 | 2.60 | 6.10  | 0.0003   | 0.0118 | lysis phenotype activator, AlpA                  | NP_249598 |
| PA1541 | 2.58 | 7.43  | 0.0002   | 0.0102 | probable drug efflux transporter                 | NP_250232 |
| PA0604 | 2.58 | 5.44  | 0.0004   | 0.0152 | AgtB                                             | NP_249295 |
| PA1921 | 2.56 | 3.56  | 0.0023   | 0.0482 | hypothetical protein                             | NP_250611 |
| PA2776 | 2.56 | 8.75  | 0.0002   | 0.0102 | FAD-dependent oxidoreductase                     | NP_251466 |
| PA3063 | 2.55 | 7.83  | 0.0003   | 0.0108 | PelB                                             | NP_251753 |
| PA0740 | 2.53 | 3.27  | 0.0023   | 0.0483 | SDS hydrolase SdsA1                              | NP_249431 |
| PA2315 | 2.53 | 3.27  | 0.0023   | 0.0483 | hypothetical protein                             | NP_251005 |
| PA1852 | 2.53 | 5.47  | 0.0005   | 0.0170 | hypothetical protein                             | NP_250543 |
| PA3729 | 2.50 | 8.55  | 0.0003   | 0.0127 | hypothetical protein                             | NP_252418 |
| PA0037 | 2.50 | 6.30  | 0.0004   | 0.0151 | transcriptional regulator TrpI                   | NP_248727 |
| PA3061 | 2.49 | 6.90  | 0.0004   | 0.0146 | PelD                                             | NP_253315 |
| PA4625 | 2.47 | 9.95  | 0.0003   | 0.0132 | cyclic diguanylate-regulated TPS partner A, CdrA | NP_253315 |
| PA1592 | 2.47 | 9.89  | 0.0003   | 0.0133 | hypothetical protein                             | NP_250283 |
| PA3730 | 2.46 | 6.72  | 0.0005   | 0.0167 | hypothetical protein                             | NP_252419 |

|        |      |       |        |        |                                                                                                            |           |
|--------|------|-------|--------|--------|------------------------------------------------------------------------------------------------------------|-----------|
| PA2849 | 2.46 | 6.15  | 0.0005 | 0.0180 | OhrR                                                                                                       | NP_251539 |
| PA4386 | 2.45 | 10.07 | 0.0004 | 0.0142 | GroES protein                                                                                              | NP_253076 |
| PA4710 | 2.45 | 6.79  | 0.0005 | 0.0167 | Heme/Hemoglobin uptake<br>outer membrane receptor<br>PhuR precursor                                        | NP_253398 |
| PA1502 | 2.45 | 4.29  | 0.0014 | 0.0362 | glyoxylate carboligase                                                                                     | NP_250193 |
| PA5428 | 2.45 | 6.67  | 0.0005 | 0.0167 | transcriptional regulator                                                                                  | NP_254115 |
| PA5212 | 2.44 | 8.91  | 0.0004 | 0.0152 | hypothetical protein                                                                                       | NP_253899 |
| PA0794 | 2.41 | 8.90  | 0.0005 | 0.0167 | aconitate hydratase                                                                                        | NP_249485 |
| PA2441 | 2.40 | 6.52  | 0.0006 | 0.0210 | hypothetical protein                                                                                       | NP_251131 |
| PA3672 | 2.40 | 6.33  | 0.0007 | 0.0219 | probable ATP-binding<br>component of ABC<br>transporter                                                    | NP_252362 |
| PA1571 | 2.40 | 4.45  | 0.0015 | 0.0367 | hypothetical protein                                                                                       | NP_250262 |
| PA1229 | 2.40 | 4.56  | 0.0014 | 0.0345 | transcriptional regulator                                                                                  | NP_249920 |
| PA2478 | 2.37 | 5.55  | 0.0009 | 0.0265 | thiol:disulfide interchange<br>protein                                                                     | NP_251168 |
| PA1542 | 2.37 | 6.31  | 0.0008 | 0.0235 | hypothetical protein                                                                                       | NP_250233 |
| PA2020 | 2.37 | 6.73  | 0.0007 | 0.0226 | MexZ                                                                                                       | NP_250710 |
| PA1226 | 2.37 | 6.54  | 0.0007 | 0.0226 | transcriptional regulator                                                                                  | NP_249917 |
| PA2886 | 2.36 | 5.26  | 0.0012 | 0.0311 | expressed protein with<br>apparent function in<br>citronellol catabolism                                   | NP_251576 |
| PA3559 | 2.35 | 6.82  | 0.0008 | 0.0234 | nucleotide sugar<br>dehydrogenase                                                                          | NP_252249 |
| PA3553 | 2.35 | 7.23  | 0.0007 | 0.0226 | ArnC                                                                                                       | NP_252243 |
| PA0922 | 2.34 | 6.83  | 0.0008 | 0.0238 | hypothetical protein                                                                                       | NP_249613 |
| PA4675 | 2.33 | 8.24  | 0.0007 | 0.0226 | ChtA                                                                                                       | NP_253364 |
| PA5178 | 2.31 | 9.24  | 0.0008 | 0.0235 | hypothetical protein                                                                                       | NP_253865 |
| PA3370 | 2.29 | 6.16  | 0.0011 | 0.0305 | hypothetical protein                                                                                       | NP_252060 |
| PA0763 | 2.28 | 11.05 | 0.0009 | 0.0257 | anti-sigma factor MucA                                                                                     | NP_249454 |
| PA3059 | 2.27 | 7.05  | 0.0011 | 0.0293 | PeIF                                                                                                       | NP_251749 |
| PA2322 | 2.25 | 5.33  | 0.0017 | 0.0411 | GntP                                                                                                       | NP_251012 |
| PA1631 | 2.24 | 5.26  | 0.0020 | 0.0442 | acyl-CoA dehydrogenase                                                                                     | NP_250322 |
| PA2510 | 2.23 | 5.25  | 0.0020 | 0.0448 | transcriptional regulator<br>CatR                                                                          | NP_251200 |
| PA1178 | 2.23 | 11.91 | 0.0011 | 0.0306 | PhoP/Q and low Mg <sup>2+</sup><br>inducible outer membrane<br>protein H1 precursor                        | NP_249869 |
| PA4385 | 2.22 | 12.54 | 0.0011 | 0.0306 | GroEL protein                                                                                              | NP_253075 |
| PA3007 | 2.22 | 8.97  | 0.0012 | 0.0322 | repressor protein LexA                                                                                     | NP_251697 |
| PA3670 | 2.20 | 7.03  | 0.0015 | 0.0377 | hypothetical protein                                                                                       | NP_252360 |
| PA0833 | 2.20 | 10.34 | 0.0013 | 0.0337 | hypothetical protein                                                                                       | NP_249524 |
| PA5473 | 2.20 | 8.82  | 0.0014 | 0.0345 | hypothetical protein                                                                                       | NP_254160 |
| PA0119 | 2.19 | 6.06  | 0.0018 | 0.0420 | dicarboxylate transporter                                                                                  | NP_248809 |
| PA2493 | 2.19 | 9.75  | 0.0014 | 0.0345 | Resistance-Nodulation-Cell<br>Division (RND) multidrug<br>efflux membrane fusion<br>protein MexE precursor | NP_251183 |

|        |       |       |        |        |                                                  |           |
|--------|-------|-------|--------|--------|--------------------------------------------------|-----------|
| PA3369 | 2.19  | 6.61  | 0.0017 | 0.0405 | hypothetical protein                             | NP_252059 |
| PA2111 | 2.17  | 5.43  | 0.0024 | 0.0500 | hypothetical protein                             | NP_250801 |
| PA1332 | 2.16  | 6.96  | 0.0018 | 0.0416 | hypothetical protein                             | NP_250023 |
| PA3058 | 2.15  | 6.14  | 0.0022 | 0.0480 | PelG                                             | NP_251748 |
| PA1597 | 2.15  | 6.98  | 0.0020 | 0.0442 | hypothetical protein                             | NP_250288 |
| PA3728 | 2.14  | 8.36  | 0.0018 | 0.0413 | hypothetical protein                             | NP_252417 |
| PA2483 | 2.14  | 7.38  | 0.0019 | 0.0441 | hypothetical protein                             | NP_251173 |
| PA1016 | 2.14  | 5.98  | 0.0023 | 0.0492 | hypothetical protein                             | NP_249707 |
| PA0754 | 2.14  | 6.38  | 0.0022 | 0.0470 | hypothetical protein                             | NP_249445 |
| PA4581 | 2.13  | 7.05  | 0.0021 | 0.0458 | transcriptional regulator RtcR                   | NP_253271 |
| PA2830 | 2.10  | 9.66  | 0.0020 | 0.0450 | heat shock protein HtpX                          | NP_251520 |
| PA4876 | 2.10  | 8.12  | 0.0022 | 0.0470 | osmotically inducible lipoprotein OsmE           | NP_253563 |
| PA5054 | 2.09  | 9.89  | 0.0021 | 0.0468 | heat shock protein HslU                          | NP_253741 |
| PA1457 | -2.09 | 8.31  | 0.0022 | 0.0480 | chemotaxis protein CheZ                          | NP_250148 |
| PA1561 | -2.11 | 9.31  | 0.0019 | 0.0441 | aerotaxis receptor Aer                           | NP_250252 |
| PA5030 | -2.14 | 7.35  | 0.0019 | 0.0432 | major facilitator superfamily (MFS) transporter  | NP_253717 |
| PA5027 | -2.15 | 8.49  | 0.0017 | 0.0405 | hypothetical protein                             | NP_253714 |
| PA1456 | -2.16 | 7.17  | 0.0018 | 0.0413 | two-component response regulator CheY            | NP_250147 |
| PA4921 | -2.16 | 6.21  | 0.0020 | 0.0448 | cholinesterase, ChoE                             | NP_253608 |
| PA3912 | -2.17 | 6.62  | 0.0019 | 0.0431 | hypothetical protein                             | NP_252601 |
| PA5207 | -2.17 | 7.44  | 0.0017 | 0.0405 | phosphate transporter                            | NP_253894 |
| PA3613 | -2.17 | 10.21 | 0.0015 | 0.0367 | hypothetical protein                             | NP_252303 |
| PA1083 | -2.18 | 6.55  | 0.0018 | 0.0413 | flagellar L-ring protein precursor FlgH          | NP_249774 |
| PA0518 | -2.19 | 7.93  | 0.0015 | 0.0364 | cytochrome c-551 precursor                       | NP_249209 |
| PA4523 | -2.20 | 7.80  | 0.0014 | 0.0356 | hypothetical protein                             | NP_253213 |
| PA3350 | -2.20 | 5.71  | 0.0019 | 0.0431 | hypothetical protein                             | NP_252040 |
| PA0519 | -2.21 | 9.86  | 0.0013 | 0.0328 | nitrite reductase precursor                      | NP_249210 |
| PA1086 | -2.21 | 6.50  | 0.0015 | 0.0370 | flagellar hook-associated protein 1 FlgK         | NP_249777 |
| PA0526 | -2.22 | 5.89  | 0.0017 | 0.0405 | hypothetical protein                             | NP_249217 |
| PA5159 | -2.22 | 5.27  | 0.0020 | 0.0442 | multidrug resistance protein                     | NP_253846 |
| PA1102 | -2.23 | 7.56  | 0.0012 | 0.0322 | flagellar motor switch protein FliG              | NP_249793 |
| PA4348 | -2.24 | 9.12  | 0.0011 | 0.0305 | hypothetical protein                             | NP_253038 |
| PA4074 | -2.25 | 5.76  | 0.0015 | 0.0367 | transcriptional regulator                        | NP_252763 |
| PA3429 | -2.26 | 4.98  | 0.0018 | 0.0425 | epoxide hydrolase                                | NP_252119 |
| PA1101 | -2.26 | 7.63  | 0.0010 | 0.0292 | Flagella M-ring outer membrane protein precursor | NP_249792 |
| PA4551 | -2.27 | 5.66  | 0.0014 | 0.0355 | type 4 fimbrial biogenesis protein PilV          | NP_253241 |
| PA4796 | -2.28 | 4.96  | 0.0017 | 0.0405 | hypothetical protein                             | NP_253484 |
| PA4535 | -2.29 | 5.72  | 0.0013 | 0.0328 | hypothetical protein                             | NP_253225 |
| PA4536 | -2.31 | 5.50  | 0.0013 | 0.0345 | hypothetical protein                             | NP_253226 |

|         |       |       |        |        |                                                                                    |           |
|---------|-------|-------|--------|--------|------------------------------------------------------------------------------------|-----------|
| PA3394  | -2.31 | 6.23  | 0.0010 | 0.0283 | NosF protein                                                                       | NP_252084 |
| PA3913  | -2.32 | 6.99  | 0.0009 | 0.0258 | protease                                                                           | NP_252602 |
| PA1085  | -2.33 | 6.83  | 0.0008 | 0.0241 | flagellar protein FlgJ                                                             | NP_249776 |
| PA1079  | -2.33 | 6.09  | 0.0010 | 0.0276 | flagellar basal-body rod modification protein FlgD                                 | NP_249770 |
| PA4359  | -2.33 | 5.55  | 0.0011 | 0.0306 | hypothetical protein                                                               | NP_253049 |
| PA1555  | -2.34 | 10.66 | 0.0007 | 0.0216 | Cytochrome c oxidase, cbb3-type, CcoP subunit                                      | NP_250246 |
| PA2119  | -2.35 | 8.64  | 0.0007 | 0.0216 | alcohol dehydrogenase (Zn-dependent)                                               | NP_250809 |
| PA3432  | -2.35 | 5.82  | 0.0009 | 0.0265 | hypothetical protein                                                               | NP_252122 |
| PA1736  | -2.36 | 7.02  | 0.0007 | 0.0226 | acyl-CoA thiolase                                                                  | NP_250427 |
| PA1557  | -2.37 | 11.39 | 0.0006 | 0.0187 | Cytochrome c oxidase, cbb3-type, CcoN subunit                                      | NP_250248 |
| PA1077  | -2.38 | 5.73  | 0.0008 | 0.0243 | flagellar basal-body rod protein FlgB                                              | NP_249768 |
| PA4550  | -2.39 | 5.69  | 0.0009 | 0.0257 | type 4 fimbrial biogenesis protein FimU                                            | NP_253240 |
| PA5497  | -2.43 | 10.07 | 0.0004 | 0.0152 | class II (cobalamin-dependent) ribonucleotide-diphosphate reductase subunit, NrdJa | NP_254184 |
| PA4100  | -2.43 | 9.26  | 0.0004 | 0.0154 | dehydrogenase                                                                      | NP_252789 |
| PA0951a | -2.44 | 5.69  | 0.0007 | 0.0219 | ribonuclease                                                                       | NP_249642 |
| PA4517  | -2.46 | 5.19  | 0.0007 | 0.0226 | chemotaxis protein CheZ                                                            | NP_250148 |
| PA1103  | -2.46 | 6.84  | 0.0005 | 0.0157 | flagellar assembly protein                                                         | NP_249794 |
| PA5160  | -2.46 | 5.01  | 0.0007 | 0.0226 | drug efflux transporter                                                            | NP_253847 |
| PA2126  | -2.48 | 6.53  | 0.0005 | 0.0157 | cupA gene regulator C, CgrC                                                        | NP_250816 |
| PA1546  | -2.48 | 10.22 | 0.0003 | 0.0130 | oxygen-independent coproporphyrinogen III oxidase                                  | NP_250237 |
| PA1555  | -2.48 | 8.74  | 0.0003 | 0.0131 | Cytochrome c oxidase, cbb3-type, CcoP subunit                                      | NP_250246 |
| PA4465  | -2.48 | 9.36  | 0.0003 | 0.0130 | hypothetical protein                                                               | NP_253155 |
| PA4571  | -2.49 | 8.95  | 0.0003 | 0.0128 | cytochrome c                                                                       | NP_253261 |
| PA4328  | -2.49 | 8.07  | 0.0003 | 0.0130 | hypothetical protein                                                               | NP_253018 |
| PA5496  | -2.50 | 7.91  | 0.0003 | 0.0130 | class II (cobalamin-dependent) ribonucleotide-diphosphate reductase subunit, NrdJb | NP_254183 |
| PA0141  | -2.51 | 9.78  | 0.0003 | 0.0117 | hypothetical protein                                                               | NP_248831 |
| PA3431  | -2.52 | 6.13  | 0.0004 | 0.0152 | hypothetical protein                                                               | NP_252121 |
| PA4587  | -2.52 | 10.39 | 0.0003 | 0.0109 | cytochrome c551 peroxidase precursor                                               | NP_253277 |
| PA4073  | -2.58 | 10.37 | 0.0002 | 0.0093 | aldehyde dehydrogenase                                                             | NP_252762 |
| PA1556  | -2.59 | 10.05 | 0.0002 | 0.0087 | Cytochrome c oxidase, cbb3-type, CcoO subunit                                      | NP_250247 |
| PA3416  | -2.60 | 3.58  | 0.0011 | 0.0306 | pyruvate dehydrogenase E1 component, beta chain                                    | NP_252106 |

|               |              |             |               |               |                                                                           |                  |
|---------------|--------------|-------------|---------------|---------------|---------------------------------------------------------------------------|------------------|
| PA0527        | -2.61        | 7.55        | 0.0002        | 0.0091        | transcriptional regulator Dnr                                             | NP_249218        |
| PA3614        | -2.62        | 8.96        | 0.0002        | 0.0081        | hypothetical protein                                                      | NP_252304        |
| PA0517        | -2.63        | 7.31        | 0.0002        | 0.0087        | c-type cytochrome precursor nirC                                          | NP_249208        |
| PA2380        | -2.64        | 3.82        | 0.0009        | 0.0252        | hypothetical protein                                                      | NP_251070        |
| PA3049        | -2.64        | 7.63        | 0.0002        | 0.0081        | ribosome modulation factor                                                | NP_251739        |
| <b>PA0515</b> | <b>-2.66</b> | <b>7.25</b> | <b>0.0002</b> | <b>0.0077</b> | <b>transcriptional regulator</b>                                          | <b>NP_249206</b> |
| PA3919        | -2.68        | 9.36        | 0.0001        | 0.0062        | hypothetical protein                                                      | NP_252608        |
| PA2567        | -2.72        | 8.51        | 0.0001        | 0.0053        | hypothetical protein                                                      | NP_251257        |
| PA5026        | -2.74        | 5.11        | 0.0002        | 0.0104        | hypothetical protein                                                      | NP_253713        |
| PA2118a       | -2.74        | 5.07        | 0.0002        | 0.0104        | O6-methylguanine-DNA methyltransferase                                    | NP_250808        |
| PA0512        | -2.78        | 6.59        | 9.55E-05      | 0.0051        | NirH                                                                      | NP_249203        |
| PA0178        | -2.79        | 4.82        | 0.0002        | 0.0098        | two-component sensor                                                      | NP_248868        |
| PA5475        | -2.83        | 9.45        | 5.45E-05      | 0.0032        | hypothetical protein                                                      | NP_254162        |
| PA1920        | -2.85        | 8.95        | 5.15E-05      | 0.0031        | class III (anaerobic) ribonucleoside-triphosphate reductase subunit, NrdD | NP_250610        |
| PA3458        | -2.88        | 7.51        | 5.16E-05      | 0.0031        | transcriptional regulator                                                 | NP_252148        |
| PA0276        | -2.89        | 5.48        | 8.29E-05      | 0.0046        | hypothetical protein                                                      | NP_248967        |
| PA4071        | -2.91        | 6.63        | 5.33E-05      | 0.0032        | hypothetical protein                                                      | NP_252760        |
| PA1918        | -2.91        | 4.56        | 0.000149      | 0.0074        | hypothetical protein                                                      | NP_250608        |
| PA1078        | -2.93        | 5.59        | 6.66E-05      | 0.0039        | flagellar basal-body rod protein FlgC                                     | NP_249769        |
| PA0516        | -2.94        | 8.52        | 3.29E-05      | 0.0023        | heme d1 biosynthesis protein NirF                                         | NP_249207        |
| PA0514        | -2.97        | 6.74        | 3.48E-05      | 0.0023        | heme d1 biosynthesis protein NirL                                         | NP_249205        |
| PA1916        | -3.01        | 3.19        | 0.000785      | 0.0235        | amino acid permease                                                       | NP_250606        |
| PA4072        | -3.06        | 9.02        | 1.59E-05      | 0.0012        | amino acid permease                                                       | NP_252761        |
| PA2318        | -3.06        | 9.22        | 1.54E-05      | 0.0012        | hypothetical protein                                                      | NP_251008        |
| PA0513        | -3.15        | 6.59        | 1.49E-05      | 0.0012        | NirG                                                                      | NP_249204        |
| PA3337        | -3.16        | 9.34        | 8.99E-06      | 0.0007        | ADP-L-glycero-D-mannoheptose 6-epimerase                                  | NP_252027        |
| PA5231        | -3.17        | 9.69        | 8.33E-06      | 0.0007        | ATP-binding/permease fusion ABC transporter                               | NP_253918        |
| PA0714        | -3.17        | 4.38        | 5.59E-05      | 0.0033        | hypothetical protein                                                      | NP_249405        |
| PA2317        | -3.29        | 9.54        | 4.23E-06      | 0.0004        | oxidoreductase                                                            | NP_251007        |
| PA5172        | -3.32        | 12.87       | 3.36E-06      | 0.0004        | ornithine carbamoyltransferase, catabolic                                 | NP_253859        |
| PA4681        | -3.35        | 3.97        | 7.15E-05      | 0.0041        | hypothetical protein                                                      | NP_253370        |
| PA5173        | -3.41        | 12.45       | 1.96E-06      | 0.0002        | carbamate kinase                                                          | NP_253860        |
| PA5230        | -3.54        | 8.10        | 1.23E-06      | 0.0001        | permease of ABC transporter                                               | NP_253917        |
| PA1917        | -3.56        | 2.04        | 0.002228      | 0.0480        | hypothetical protein                                                      | NP_250607        |
| PA5171        | -3.85        | 13.39       | 1.43E-07      | 2.06E-05      | arginine deiminase                                                        | NP_253858        |
| PA1919        | -3.94        | 7.41        | 1.49E-07      | 2.09E-05      | class III (anaerobic) ribonucleoside-triphosphate                         | NP_250609        |

|        |       |       |          |          |                                                   |           |
|--------|-------|-------|----------|----------|---------------------------------------------------|-----------|
|        |       |       |          |          | reductase activating protein,<br>'activase', NrdG |           |
| PA4682 | -3.98 | 5.20  | 5.82E-07 | 6.90E-05 | hypothetical protein                              | NP_253371 |
| PA5170 | -4.24 | 12.72 | 1.22E-08 | 2.51E-06 | arginine/ornithine antiporter                     | NP_253857 |
| PA4683 | -4.25 | 6.35  | 5.28E-08 | 8.54E-06 | hypothetical protein                              | NP_253372 |
| PA0713 | -5.07 | 3.90  | 2.81E-07 | 3.66E-05 | hypothetical protein                              | NP_249404 |

(A)

*P. aeruginosa* ATCC 27853

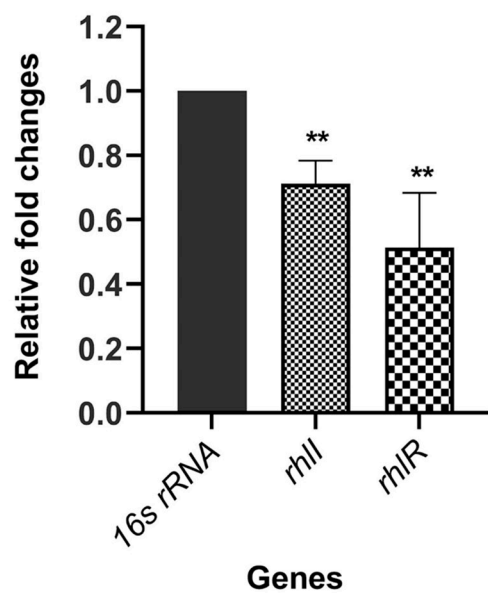

(B)

*P. aeruginosa* ATCC BAA-2108

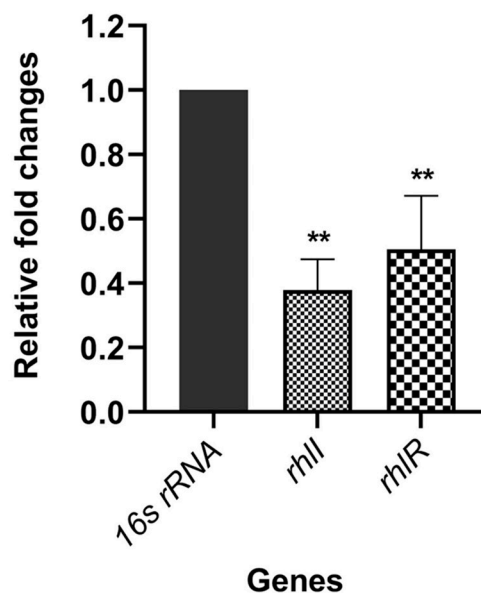

**Figure S1.** The relative expression of quorum sensing-related genes in (A) *P. aeruginosa* ATCC 27853 strain with hydroquinine at 1.250 mg/mL for 1 h and (B) *P. aeruginosa* ATCC BAA-2108 strain treated with hydroquinine at 0.625 mg/mL for 1 h, compared to the corresponding untreated control. The asterisk \*\* symbol was  $p < 0.01$ .
